# Supplementary material for: Genome-wide annotation and analysis of zebra finch microRNA repertoire reveal sex-biased expression
Source: PubMed Central journal article supplement (PMC3585881; doi:10.1186/1471-2164-13-727), 2012-12-26
Supplement: 1471-2164-13-727-S1.pdf [file 1471-2164-13-727-S1.pdf]

Additional file 1. Summary of small RNA sequences in 8 samples

| Classification                                                       | Total             | Female           |                  |                 |                  | Male             |                  |                 |                  |
|----------------------------------------------------------------------|-------------------|------------------|------------------|-----------------|------------------|------------------|------------------|-----------------|------------------|
|                                                                      |                   | Brain            | Heart            | Liver           | Muscle           | Brain            | Heart            | Liver           | Muscle           |
| <b>Raw Illumina GA reads</b>                                         | 23366676          | 2688206          | 5596759          | 969577          | 3096459          | 1623849          | 4606782          | 516456          | 4268588          |
| <b>High quality reads after filtering single read sequences</b>      | 19424182          | 2299762          | 4752051          | 783321          | 2437464          | 1460197          | 3819237          | 450480          | 3421670          |
| <b>Non-redundant sequences after filtering single read sequences</b> | 402321            | 141184           | 228117           | 84301           | 212667           | 78611            | 212343           | 46967           | 181443           |
| <b>Reads with perfect match to genome (%)</b>                        | 11708847<br>(60%) | 1467218<br>(64%) | 2861627<br>(60%) | 439337<br>(56%) | 2019463<br>(59%) | 967322<br>(66%)  | 2291015<br>(60%) | 252526<br>(56%) | 1410339<br>(58%) |
| <b>Non-redundant sequences with perfect match to genome (%)</b>      | 66541<br>(17%)    | 29916<br>(21%)   | 44722<br>(20%)   | 23695<br>(28%)  | 49572<br>(23%)   | 13344<br>(17%)   | 43545<br>(21%)   | 13274<br>(28%)  | 45815<br>(25%)   |
| <b>Reads homology to miRBase miRNA (%)</b>                           | 12470982<br>(64%) | 1619412<br>(70%) | 3284065<br>(69%) | 441943<br>(56%) | 1168793<br>(48%) | 1265741<br>(87%) | 2361307<br>(62%) | 329407<br>(73%) | 2000314<br>(58%) |
| <b>Non-redundant sequences homology to miRBase miRNA</b>             | 78922             | 36880            | 47515            | 17609           | 30156            | 30511            | 42957            | 14049           | 38641            |
| <b>Reads originated from rRNA/tRNA/other ncRNAs (%)</b>              | 4754931<br>(24%)  | 427621<br>(19%)  | 1028406<br>(22%) | 211652<br>(27%) | 939435<br>(39%)  | 35455<br>(2%)    | 1035338<br>(27%) | 39073<br>(9%)   | 1037951<br>(30%) |
| <b>Reads originated from mRNA (%)</b>                                | 37401<br>(0.2%)   | 2763<br>(0.1%)   | 5671<br>(0.1%)   | 2478<br>(0.3%)  | 6903<br>(0.3%)   | 989<br>(0.1%)    | 5567<br>(0.1%)   | 831<br>(0.2%)   | 12199<br>(0.4%)  |
| <b>Reads originated from repeats (%)</b>                             | 85655<br>(0.4%)   | 7492<br>(0.3%)   | 16568<br>(0.3%)  | 4109<br>(0.5%)  | 18463<br>(0.8%)  | 1018<br>(0.1%)   | 19471<br>(0.5%)  | 1154<br>(0.3%)  | 17380<br>(0.5%)  |
| <b>MiRNA species</b>                                                 | 193               | 186              | 179              | 164             | 175              | 184              | 180              | 164             | 177              |
