# Supplementary material for: Genome-wide annotation and analysis of zebra finch microRNA repertoire reveal sex-biased expression
Source: PubMed Central journal article supplement (PMC3585881; doi:10.1186/1471-2164-13-727), 2012-12-26
Supplement: 1471-2164-13-727-S6.pdf [file 1471-2164-13-727-S6.pdf]

miR-7\* on precursor 1 (chrZ:52731917-52731994[+]): 215 reads

```
5'   U           A       A           U           UU   GAU
     GU CUGUGUGG AGACU GUGAUUU GUUGUU   UU   A
     CA GGUAUACC UCUGA CACUAAA CAACAG   AA   A
3'   C           G           -           -           UU   AUC
```

miR-7\* on precursor 2 (chr10:13221460-13221527[-]): 11 reads

```
5'   U   A       A           U           U   AU   CU
     CUG GG AGACU GUGAUUU GUUGU GU GG C
     GAU CC UCUGA CACUGAA CAACA CA CC A
3'   C   G           -           -           C   --   CU
```

miR-7\* on precursor 3 (chr28:3838847-3838931[-]): 9 reads

```
5'   CU           A   A   G           U           UG G U
     GCCUGG CUGUGUGG AG CUA UGAUUU GUUGU U UU G
     CGGACC GACAUACC UC GAU ACUAAA CAACA G AA U
3'   C-           G   C           -           -           GU G A
```
