# Supplementary material for: Genome-wide annotation and analysis of zebra finch microRNA repertoire reveal sex-biased expression
Source: PubMed Central journal article supplement (PMC3585881; doi:10.1186/1471-2164-13-727), 2012-12-26

**A**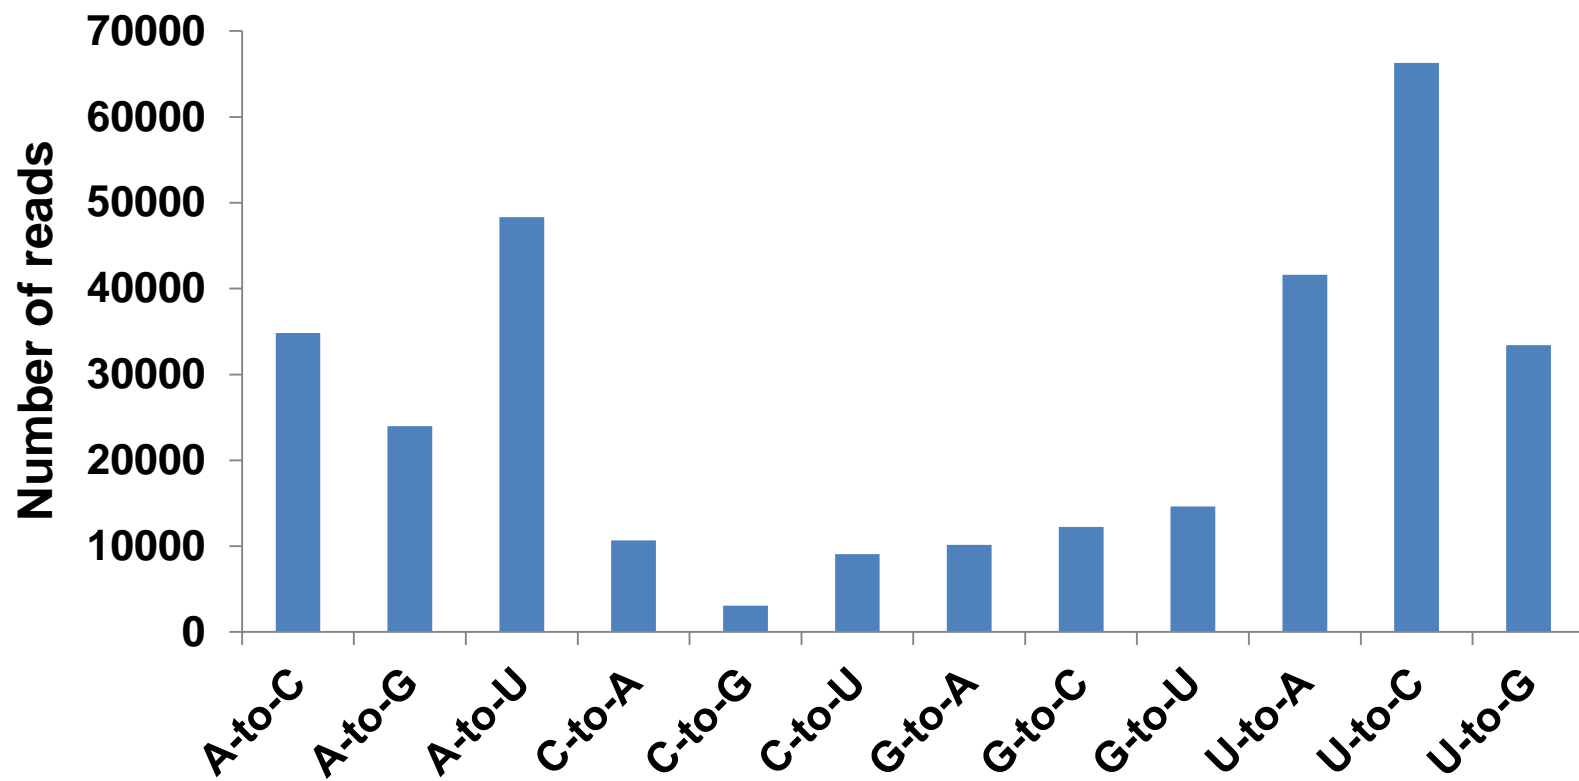**B**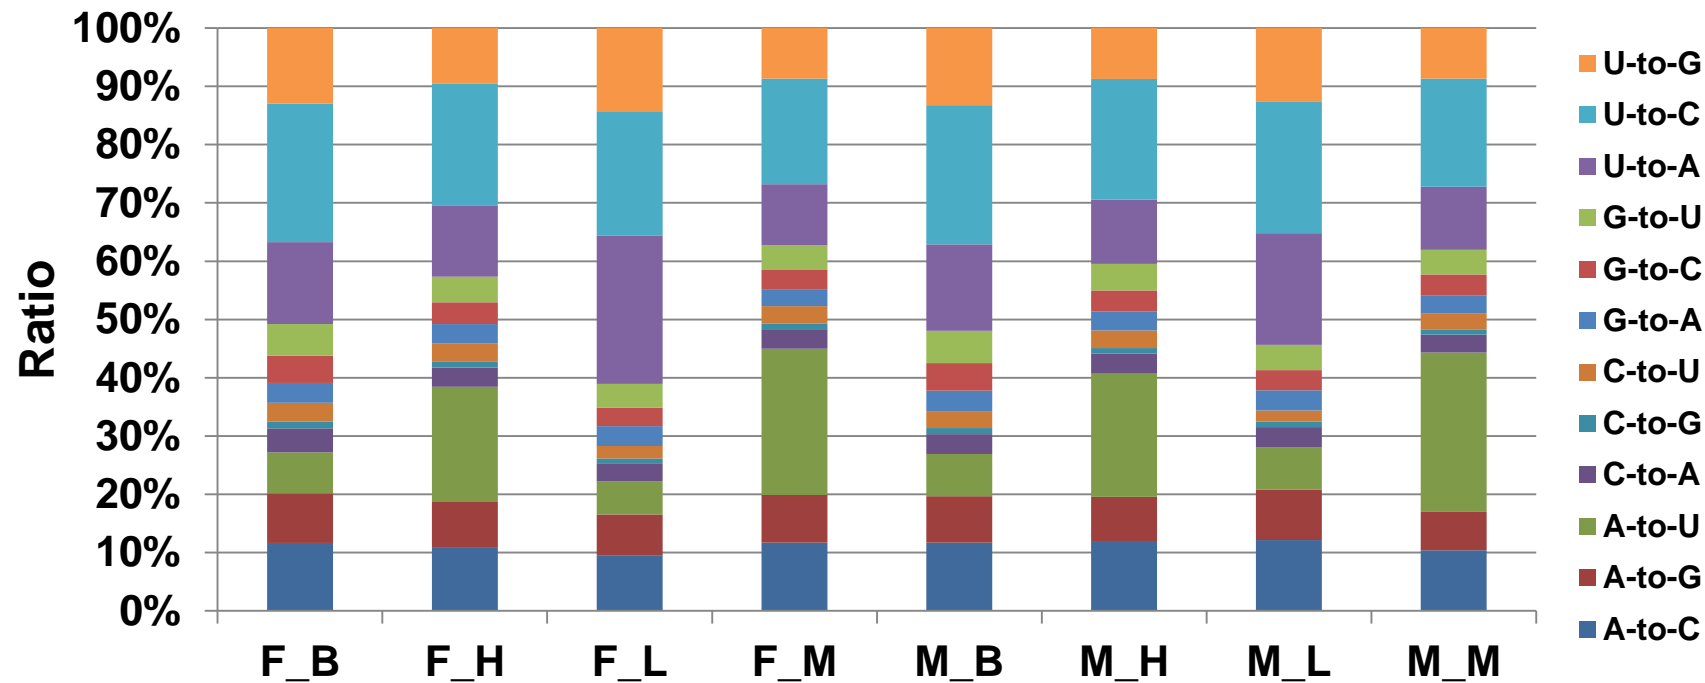

Supplement: 1471-2164-13-727-S11.pdf [file 1471-2164-13-727-S11.pdf]
