# Supplementary material for: Genome-wide annotation and analysis of zebra finch microRNA repertoire reveal sex-biased expression
Source: BMC Genomics. 2012 Dec 26;13:727. doi: 10.1186/1471-2164-13-727 (PMC3585881; doi:10.1186/1471-2164-13-727)
Supplement: Additional file 8 — Sequence reads of tgu-miR-451 and precursor structures of the atypically generated miR-451 in zebra finch, mouse, and human. [file 1471-2164-13-727-S8.pdf]

# B

**tgu-miR-451 precursor**

1875

292

454

73784

41153

16108

327

128

3

3026

33

4

82

58

Human:

A GA A  
 UUGGG AUGGCAAG AACCGUUACCAUACUG G  
 GACCC UAUCGUUC UUGGUAAUGGUAAUGAU U  
 A UC U
